# Supplementary material for: Overexpression of the LcCUC2-like gene in Arabidopsis thaliana alters the cotyledon morphology and increases rosette leaf number
Source: PeerJ. 2022 Feb 2;10:e12615. doi: 10.7717/peerj.12615 (PMC8817629; doi:10.7717/peerj.12615)
Supplement: Supplemental Information 5 — We applied the 2\documentclass[12pt]{minimal} \usepackage{amsmath} \usepackage{wasysym} \usepackage{amsfonts} \usepackage{amssymb} \usepackage{amsbsy} \usepackage{upgreek} \usepackage{mathrsfs} \setlength{\oddsidemargin}{-69pt} \begin{document} }{}${}_{T}^{-\Delta \Delta C}$\end{document}T−ΔΔC method to analyze the data from relative quantification. [file peerj-10-12615-s005.xlsx]

## Sheet: Sheet1
Relative expression levels of LcCUC2-likein leaves of different developmental stages in L. chinense
Biological replication 1
	Cт (LcCUC2-like)	CтActin97	ΔCт-mean	ΔCт		ΔΔCт-mean	ΔΔCт	2^-ΔΔCт	average	sd
leaf bud	28.402	19.0118	19.0256	9.3764	9.60555	9.60555	-0.229155	1.17215	1.00671	0.145438
leaf bud	28.7848	19.0415	19.0256	9.75917		9.60555	0.153622	0.898991
leaf bud	28.7067	19.0235	19.0256	9.68108		9.60555	0.0755329	0.948992
newly expanded leaves	28.3511	18.2475	18.3293	10.0218		9.60555	0.416251	0.749369	0.686163	0.0879688
newly expanded leaves	28.402	18.3539	18.3293	10.0726		9.60555	0.467089	0.723423
newly expanded leaves	28.7067	18.3867	18.3293	10.3773		9.60555	0.771777	0.585696
larger leaves	31.9757	18.9206	18.8879	13.0878		9.60555	3.48223	0.0894838	0.10851	0.0292073
larger leaves	31.3081	18.9216	18.8879	12.4202		9.60555	2.81463	0.142138
larger leaves	31.9061	18.8215	18.8879	13.0182		9.60555	3.41263	0.0939067
mature leaves	31.6748	18.1366	18.121	13.5539		9.60555	3.94831	0.0647797	0.0862275	0.0205829
mature leaves	30.9668	18.2083	18.121	12.8459		9.60555	3.24032	0.10582
mature leaves	31.2315	18.018	18.121	13.1105		9.60555	3.505	0.0880828
Biological replication 2
	Cт (LcCUC2-like)	CтActin97	ΔCт-mean	ΔCт		ΔΔCт-mean	ΔΔCт	2^-ΔΔCт	average	sd
leaf bud	28.9532	19.447	19.3315	9.6217	9.67137	9.67137	-0.0496744	1.03503	1.00119	0.0590835
leaf bud	28.9524	19.4613	19.3315	9.62095		9.67137	-0.0504278	1.03557
leaf bud	29.103	19.0862	19.3315	9.77148		9.67137	0.100102	0.932967
newly expanded leaves	33.6591	19.5167	19.3083	14.3508		9.67137	4.67942	0.039026	0.0400082	0.000986234
newly expanded leaves	33.588	18.9705	19.3083	14.2797		9.67137	4.60829	0.0409984
newly expanded leaves	33.6236	19.4378	19.3083	14.3152		9.67137	4.64385	0.0400001
larger leaves	33.5703	18.7858	18.8492	14.7211		9.67137	5.04972	0.0301913	0.0282184	0.00195084
larger leaves	33.7699	18.9761	18.8492	14.9207		9.67137	5.24932	0.0262904
larger leaves	33.6701	18.7858	18.8492	14.8209		9.67137	5.14952	0.0281735
mature leaves	34.8231	19.8005	19.8388	14.9844		9.67137	5.313	0.0251553	0.0288691	0.00560165
mature leaves	34.3338	19.7194	19.8388	14.4951		9.67137	4.82368	0.0353123
mature leaves	34.7678	19.9964	19.8388	14.929		9.67137	5.25761	0.0261398
Biological replication 3
	Cт (LcCUC2-like)	CтActin97	ΔCт-mean	ΔCт		ΔΔCт-mean	ΔΔCт	2^-ΔΔCт	average	sd
leaf bud	29.8618	19.6087	19.6096	10.2521	10.2607	10.2607	-0.00858752	1.00597	1.00008	0.0153547
leaf bud	29.8537	19.6241	19.6096	10.2441		10.2607	-0.0166613	1.01162
leaf bud	29.8956	19.5961	19.6096	10.286		10.2607	0.0252488	0.982651
newly expanded leaves	35.0952	19.4277	19.4314	15.6638		10.2607	5.40308	0.0236325	0.0290108	0.0113266
newly expanded leaves	34.2647	19.4337	19.4314	14.8333		10.2607	4.57262	0.0420245
newly expanded leaves	35.24	19.4328	19.4314	15.8086		10.2607	5.54791	0.0213753
larger leaves	34.2547	19.4366	19.4281	14.8267		10.2607	4.56593	0.04222	0.0360721	0.00532717
larger leaves	34.6025	19.4118	19.4281	15.1744		10.2607	4.91372	0.0331758
larger leaves	34.618	19.4358	19.4281	15.19		10.2607	4.92926	0.0328205
mature leaves	36.2351	20.1608	20.1593	16.0758		10.2607	5.81512	0.0177613	0.0139523	0.00365949
mature leaves	36.9985	20.129	20.1593	16.8392		10.2607	6.57852	0.0104633
mature leaves	36.6168	20.1879	20.1593	16.4575		10.2607	6.19682	0.0136324
