# Supplementary material for: Overexpression of the LcCUC2-like gene in Arabidopsis thaliana alters the cotyledon morphology and increases rosette leaf number
Source: PeerJ. 2022 Feb 2;10:e12615. doi: 10.7717/peerj.12615 (PMC8817629; doi:10.7717/peerj.12615)
Supplement: Supplemental Information 10 — We applied the 2\documentclass[12pt]{minimal} \usepackage{amsmath} \usepackage{wasysym} \usepackage{amsfonts} \usepackage{amssymb} \usepackage{amsbsy} \usepackage{upgreek} \usepackage{mathrsfs} \setlength{\oddsidemargin}{-69pt} \begin{document} }{}${}_{T}^{-\Delta \Delta C}$\end{document}T−ΔΔC method to analyze the data from relative quantification. [file peerj-10-12615-s010.xlsx]

## Sheet: Sheet1
The expression level of some genes in WT and transgenic A. thaliana plants
WT				ΔCт-mean	ΔCт			ΔΔCт-mean	ΔΔCт				rq				average	sd
Actin2	21.6424	21.5424	21.5989	21.5946
AtYUC2	31.3579	31.6323	30.9277		9.76337	10.0377	9.3331	9.71139	0.0519854	0.326304	-0.37829		0.964608	0.797577	1.2998		1.02066	0.255761
AtYUC6	31.2648	31.5518	31.168		9.67026	9.95724	9.5734	9.73363	-0.0633736	0.223606	-0.160233		1.04491	0.856422	1.11747		1.00627	0.134744
AtAUX1	25.0874	25.1813	25.1155		3.49285	3.58677	3.52093	3.53351	-0.0406666	0.0532551	-0.0125885		1.02859	0.963759	1.00876		1.00037	0.0332197
AtPIN1	31.8229	31.5986	31.923		10.2284	10.004	10.3285	10.187	0.0414187	-0.182941	0.141522		0.971699	1.1352	0.906562		1.00449	0.11779
35S::LcCUC2L-OE1
Actin2	21.8545	21.7967	21.931	21.8607
AtYUC2	30.7219	30.7752	30.8087		8.86117	8.91447	8.94794		-0.85022	-0.796911	-0.763441		1.80278	1.73738	1.69753		1.7459	0.053135
AtYUC6	31.1279	31.74	31.1144		9.26713	9.87924	9.25364		-0.46651	0.145606	-0.479996		1.38176	0.903999	1.39474		1.22683	0.279658
AtAUX1	24.7768	24.7331	24.7785		2.91608	2.87235	2.91774		-0.617432	-0.661168	-0.615773		1.53414	1.58136	1.53238		1.54929	0.0277855
AtPIN1	31.5222	31.347	31.0173		9.66148	9.48631	9.15658		-0.525469	-0.70064	-1.03037		1.4394	1.62523	2.04255		1.70239	0.30889
35S::LcCUC2L-OE3
Actin2	21.5266	21.5645	21.4781	21.523
AtYUC2	29.422	29.3218	29.2042		7.89891	7.7988	7.68115		-1.81248	-1.91258	-2.03023		3.51245	3.76483	4.08471		3.78733	0.28679
AtYUC6	30.9325	31.1227	30.9961		9.40942	9.59967	9.47303		-0.324212	-0.133968	-0.26061		1.25198	1.09731	1.19799		1.18242	0.078502
AtAUX1	24.1843	24.2004	24.2176		2.66127	2.67738	2.69456		-0.872249	-0.856136	-0.838958		1.83051	1.81018	1.78876		1.80982	0.0208806
AtPIN1	30.2592	30.5599	30.6999		8.73618	9.03689	9.17687		-1.45077	-1.15006	-1.01008		2.73355	2.21922	2.01403		2.32227	0.370662
35S::LcCUC2L-OE5
Actin2	19.4367	19.4664	19.5504	19.4845
AtYUC2	27.0092	26.9935	26.9906		7.52474	7.50901	7.52474		-2.18664	-2.20237	-2.18664		4.55245	4.60236	4.55245		4.56908	0.0288176
AtYUC6	27.6995	27.9354	27.9537		8.21499	8.45089	8.46923		-1.51864	-1.28274	-1.2644		2.86522	2.43301	2.40228		2.56684	0.258863
AtAUX1	23.1231	23.1548	23.1851		3.63861	3.67032	3.70064		0.105094	0.136808	0.167129		0.929744	0.909529	0.890613		0.909962	0.019569
AtPIN1	27.3078	27.2554	27.3164		7.82332	7.77093	7.83196		-2.36363	-2.41602	-2.35499		5.14664	5.33695	5.11591		5.19983	0.119737
WT				ΔCт-mean	ΔCт			ΔΔCт-mean	ΔΔCт				rq				average	sd
Actin2	21.9342	21.9636	21.9328	21.9435
AtYUC4	34.1284	34.1078	34.0872		12.1849	12.1643	12.1437	12.1643	0.0206146	0	-0.0206146		0.985813	1	1.01439		1.00007	0.0142896
AtPIN3	26.9799	27.01	27.091		5.03635	5.06642	5.14744	5.08341	-0.047053	-0.0169837	0.0640367		1.03315	1.01184	0.956584		1.00053	0.0395186
AtPIN4	26.3319	26.3236	26.3574		4.38835	4.3801	4.41387	4.3941	-0.00575574	-0.0140069	0.0197627		1.004	1.00976	0.986395		1.00005	0.0121707
AtKNAT6	31.813	31.5635	31.6863		9.86943	9.62	9.74279	9.74407	0.125357	-0.124071	-0.00128555		0.916777	1.08981	1.00089		1.00249	0.0865253
35S::LcCUC2L-OE1
Actin2	21.904	21.9228	21.9394	21.9221
AtYUC4	33.7763	33.925	33.9155		11.8542	12.003	11.9934		-0.310055	-0.161332	-0.170846		1.23976	1.11832	1.12572		1.16126	0.0680759
AtPIN3	25.4095	25.4249	25.4412		3.48742	3.5028	3.51914		-1.59598	-1.58061	-1.56426		3.02301	2.99095	2.95727		2.99041	0.0328747
AtPIN4	25.496	25.5028	25.5467		3.57397	3.5808	3.62466		-0.820131	-0.813309	-0.769445		1.76557	1.75724	1.70461		1.74247	0.0330497
AtKNAT6	31.1101	30.5019	30.3799		9.18803	8.57987	8.45781		-0.556037	-1.1642	-1.28626		1.47022	2.24109	2.43895		2.05009	0.511827
35S::LcCUC2L-OE3
Actin2	21.7662	21.7116	21.7158	21.7312
AtYUC4	32.3593	32.3984	32.3798		10.6281	10.6671	10.6486		-1.5362	-1.49714	-1.5157		2.90029	2.82283	2.85937		2.86083	0.0387506
AtPIN3	25.97	25.9274	25.9439		4.23874	4.19622	4.21267		-0.844666	-0.887186	-0.870733		1.79585	1.84957	1.82859		1.82467	0.0270724
AtPIN4	25.7714	25.7847	25.782		4.04019	4.05346	4.05074		-0.353919	-0.340644	-0.343362		1.27803	1.26632	1.26871		1.27102	0.00618545
AtKNAT6	29.9274	29.9503	30.1139		8.19617	8.21906	8.38264		-1.5479	-1.52501	-1.36143		2.92391	2.87789	2.5694		2.7904	0.19277
35S::LcCUC2L-OE5
Actin2	19.4367	19.4664	19.5504	19.4845
AtYUC4	28.2619	28.2	28.2167		8.77744	8.71553	8.73227	12.1643	-3.38685	-3.44876	-3.43202		10.4603	10.9189	10.793		10.7241	0.236956
AtPIN3	23.171	23.1572	23.1853		3.68658	3.6727	3.70081	5.08341	-1.39683	-1.41071	-1.38259		2.63322	2.65868	2.60736		2.63309	0.0256565
AtPIN4	23.5717	23.5274	23.5464		4.0872	4.04292	4.06192	4.3941	-0.306906	-0.351185	-0.332181		1.23705	1.27561	1.25891		1.25719	0.0193358
AtKNAT6	27.9841	27.9714	27.993		8.49961	8.48691	8.50857	9.74407	-1.24446	-1.25717	-1.2355		2.3693	2.39026	2.35463		2.37139	0.0179046
WT				ΔCт-mean	ΔCт			ΔΔCт-mean	ΔΔCт				rq				average	sd
Actin2	21.6626	21.6308	21.5643	21.6192
AtKNAT2	34.933	34.0569	34.3735		13.3138	12.4377	12.7542	12.8352	0.478542	-0.39753	-0.0810127		0.717702	1.31725	1.05776		1.0309	0.300675
AtDPA4	34.9015	34.2242	34.9373		13.2823	12.6049	13.3181	13.0684	0.213861	-0.463492	0.249631		0.862227	1.37888	0.841111		1.0274	0.304566
35S::LcCUC2L-OE1
Actin2	21.9277	21.9304	21.9256	21.9279
AtKNAT2	34.3486	34.1677	34.0021		12.4207	12.2398	12.0742		-0.414527	-0.595473	-0.761019		1.33286	1.51097	1.69469		1.51284	0.18092
AtDPA4	34.2052	34.0913	34.1421		12.2773	12.1634	12.2142		-0.791124	-0.905	-0.854207		1.73042	1.87254	1.80777		1.80358	0.0711539
35S::LcCUC2L-OE3
Actin2	21.692	21.6406	21.6585	21.6637
AtKNAT2	32.738	31.991	32.3507		11.0743	10.3273	10.687		-1.76095	-2.50795	-2.14823		3.38921	5.68813	4.43283		4.50339	1.15109
AtDPA4	33.702	33.7545	33.8066		12.0383	12.0908	12.1429		-1.03015	-0.977636	-0.925565		2.04224	1.96924	1.89943		1.9703	0.0714121
35S::LcCUC2L-OE5
Actin2	19.4367	19.4664	19.5504	19.4845
AtKNAT2	28.3735	28.6423	28.6023		8.889	9.15783	9.11786	12.8352	-3.94624	-3.67741	-3.71738		15.4147	12.7941	13.1535		13.7875	1.42068
AtDPA4	29.4246	29.4084	29.213		9.94017	9.92393	9.72858	13.0684	-3.12826	-3.14449	-3.33985		8.74378	8.84273	10.125		9.23716	0.77046
	Actin2	ΔCт-mean	AtCUC2		ΔCт	ΔΔCт-mean	ΔΔCт	2^-ΔΔCт	average	sd
WT	21.5136	21.5031	37.9547		16.4516	16.2731	0.178486	0.88363	1.00511	0.124112
	21.5093	21.5031	37.5977		16.0946	16.2731	-0.178486	1.1317
	21.4864	21.5031	37.7762		16.2731	16.2731	0	1
35S::LcCUC2L-OE1	21.6124	21.5652	36.694		15.1288	16.2731	-1.14434	2.21044	2.54688	0.538634
	21.5996	21.5652	36.1747		14.6095	16.2731	-1.66363	3.16813
	21.4835	21.5652	36.6607		15.0955	16.2731	-1.17765	2.26207
35S::LcCUC2L-OE3	22.102	22.0539	36.0303		13.9764	16.2731	-2.29674	4.91346	4.8928	0.322064
	22.055	22.0539	36.1377		14.0838	16.2731	-2.18932	4.56091
	22.0047	22.0539	35.9474		13.8935	16.2731	-2.37963	5.20404
35S::LcCUC2L-OE5	19.2488	19.2504	34.1947		14.9443	16.2731	-1.32883	2.51199	2.786	0.27877
	19.2615	19.2504	33.9056		14.6552	16.2731	-1.61791	3.0693
	19.2409	19.2504	34.0502		14.7998	16.2731	-1.47337	2.7767
